# Supplementary material for: Insulin sensitivity in long-lived growth hormone-releasing hormone knockout mice
Source: publisher site journal article supplement (doi:10.18632/aging.103588), 2020-07-08
Supplement: Supplementary file [file aging-v12i18-103588-supplementary-material-SD1.pdf]

## SUPPLEMENTARY FIGURE

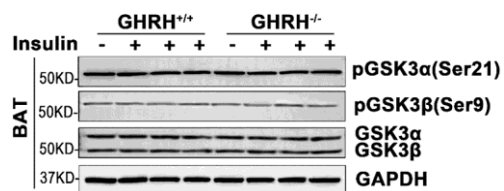

**Supplementaru Figure 1. Activation of GSK3α/β in adipose tissue of GHRH<sup>-/-</sup> mice.** The 4 hours fasted mice were injected i.p. with porcine insulin (1 IU/kg of body weight). After 20 min, tissues were collected to perform western blots. n=4 for WT group and n=6 for GHRH<sup>-/-</sup> mice.
